# Supplementary material
Source: PubMed Central journal article supplement (PMC3398774)
Supplement: 97320630008504S1.pdf [file 97320630008504S1.pdf]

## Supplementary material:

**Table 1:** Statistical Results of Protein Structure evaluation for RpfF protein through PROCHECK

| <b>Ramachandran plot region</b> | <b>SwissModel</b> | <b>Modeller</b> | <b>Geno3D</b> |
|---------------------------------|-------------------|-----------------|---------------|
| Residues in favored region      | 97.8%             | 96.2%           | 91.7%         |
| Residues in allowed regions     | 1.6%              | 2.1%            | 7.5%          |
| Residues in disallowed regions  | 0.6%              | 1.7%            | 0.8%          |

**Table 2:** Statistical Results of Protein Structure evaluation for RpfF protein through TM-Score and Super pose

| <b>Soft ware</b> | <b>TM-Score</b> | <b>Rmsd</b> |
|------------------|-----------------|-------------|
| SWISS MODELL     | 0.1867          | 2.094       |
| MODELLER         | 0.7749          | 1.520       |
| GENO3D           | 0.1834          | 2.86        |
